# Supplementary material
Source: Springer Nature journal article supplement (https://www.springermedizin.de/resource/supplementary/12885_2008_1417_MOESM6_ESM.pdf/9473086)
Supplement: MOESM6 [file 9473086]

## APRIL expression

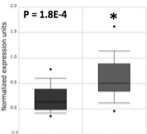

Glioma: alive at 3 years (13)

Glioma: dead at 3 years (56)

Freije et al. *Cancer Res* 2004

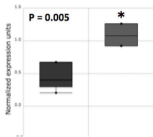

Bladder carcinoma: alive at 3 years (13)

Bladder carcinoma: dead at 3 years (41)

Modlich et al. *Clin Cancer Res* 2004

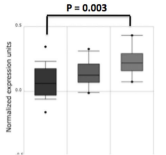

Breast carcinoma grade 1 (22)

Breast carcinoma grade 2 (16)

Breast carcinoma grade 3 (8)

Farmer et al. *Oncogene* 2005

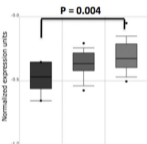

Breast carcinoma grade 1 (4)

Breast carcinoma grade 2 (12)

Breast carcinoma grade 3 (39)

Ginestier et al. *Clin Cancer Res* 2006

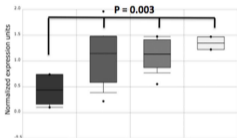

Cervical carcinoma Stage IB (6)

Cervical carcinoma stage IIB (15)

Cervical carcinoma grade IIIB (10)

Cervical carcinoma stage IVB (2)

Bochtary et al. *Clin Cancer Res* 2006

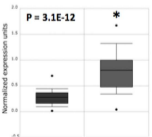

Glioma: Grade 3 (25)

Glioma: Grade 4 (59)

Freije et al. *Cancer Res* 2004
